# Supplementary material for: An Optimized Bioassay for Screening Combined Anticoronaviral Compounds for Efficacy against Feline Infectious Peritonitis Virus with Pharmacokinetic Analyses of GS-441524, Remdesivir, and Molnupiravir in Cats
Source: MDPI journal article supplement (doi:10.3390/v14112429), 2022-11-01
Supplement: s1 [file s1]

**Table S1.** Baseline and 48 hour post-MPV complete blood count and biochemistry panel for 20-024.

| ID #   |          | WBC (K/u) | Absolute Neutrophil cells (K/u) | Absolute Lymphocyte cells (K/u) | Absolute Monocyte cells (K/u) | Absolute Eosinophil cells (K/u) | Absolute Basophil cells (K/u) | Neutrophil % | Lymphocyte % | Monocyte % | Eosinophil % | Basophil % | RBC (M/u) | Hemoglobin (g/dL) | Hematocrit % | MCV (fL) | MCH (pg) | MCHC (g/dL) | RDW % | Platelets (K/uL) | MPV (fL) | Presence of clots |
|--------|----------|-----------|---------------------------------|---------------------------------|-------------------------------|---------------------------------|-------------------------------|--------------|--------------|------------|--------------|------------|-----------|-------------------|--------------|----------|----------|-------------|-------|------------------|----------|-------------------|
| 20-024 | Baseline | 7.14      | 3.83                            | 3.08                            | 0.13                          | 0.10                            | 0.01                          | 53.66        | 43.11        | 1.76       | 1.36         | 0.11       | 11.46     | 14.4              | 46.9         | 40.9     | 12.6     | 30.7        | 19.8  | 175              | 11.1     | none              |
|        | 48 hour  | 8.66      | 5.79                            | 2.50                            | 0.09                          | 0.26                            | 0.01                          | 66.88        | 28.91        | 1.07       | 3.00         | 0.13       | 9.54      | 11.7              | 39.8         | 41.7     | 12.3     | 29.4        | 19.9  | 241              | 11.8     | none              |

| ID #   |          | Alanine Transaminase U/L | Aspartate Transaminase U/L | Albumin g/dL | Alkaline Phosphatase U/L | Amylase U/L | Blood Urea Nitrogen mg/dL | Calcium mg/dL | Chloride mmol/L | Creatinine mg/dL | Glucose mg/dL | Potassium mmol/L | Sodium mmol/L | Phosphorus mg/dL | Total Bilirubin mg/dL | Total Protein g/dL | Hemolysis: |
|--------|----------|--------------------------|----------------------------|--------------|--------------------------|-------------|---------------------------|---------------|-----------------|------------------|---------------|------------------|---------------|------------------|-----------------------|--------------------|------------|
| 20-024 | Baseline | 62.4                     | 79.0                       | 3.78         | 7.0                      | 889.6       | 26.4                      | 9.92          | 114.5           | 0.767            | 86.1          | 4.90             | 149           | 5.89             | 0.045                 | 6.61               | trace      |
|        | 48 hour  | 58.2                     | 27.5                       | 3.59         | 28.6                     | 893.0       | 23.8                      | 10.11         | 114.7           | 0.847            | 108.9         | 4.79             | 150           | 5.38             | 0.024                 | 6.08               | none       |

Hemolysis observed; may falsely elevate AST.

**Table S2.** Baseline and 48 hour post-MPV complete blood count and biochemistry panel for 20-025.

| ID #   |          | WBC (K/u) | Absolute Neutrophil cells (K/u) | Absolute Lymphocyte cells (K/u) | Absolute Monocyte cells (K/u) | Absolute Eosinophil cells (K/u) | Absolute Basophil cells (K/u) | Neutrophil % | Lymphocyte % | Monocyte % | Eosinophil % | Basophil % | RBC (M/u) | Hemoglobin (g/dL) | Hematocrit % | MCV (fL) | MCH (pg) | MCHC (g/dL) | RDW % | Platelets (K/uL) | MPV (fL) | Presence of clots |
|--------|----------|-----------|---------------------------------|---------------------------------|-------------------------------|---------------------------------|-------------------------------|--------------|--------------|------------|--------------|------------|-----------|-------------------|--------------|----------|----------|-------------|-------|------------------|----------|-------------------|
| 20-025 | Baseline | 12.14     | 3.52                            | 6.56                            | 0.54                          | 1.50                            | 0.01                          | 29.03        | 54.00        | 4.48       | 12.38        | 0.11       | 11.73     | 13.9              | 44.3         | 37.8     | 11.8     | 31.4        | 20.9  | 134              | 11.7     | none              |
|        | 48 hour  | 13.64     | 5.55                            | 7.05                            | 0.37                          | 0.66                            | 0.01                          | 40.66        | 51.68        | 2.72       | 4.84         | 0.10       | 10.36     | 12.6              | 40.4         | 39.0     | 12.2     | 31.2        | 20.7  | 115              | 11.5     | none              |

| ID #   |          | Alanine Transaminase U/L | Aspartate Transaminase U/L | Albumin g/dL | Alkaline Phosphatase U/L | Amylase U/L | Blood Urea Nitrogen mg/dL | Calcium mg/dL | Chloride mmol/L | Creatinine mg/dL | Glucose mg/dL | Potassium mmol/L | Sodium mmol/L | Phosphorus mg/dL | Total Bilirubin mg/dL | Total Protein g/dL | Hemolysis: |
|--------|----------|--------------------------|----------------------------|--------------|--------------------------|-------------|---------------------------|---------------|-----------------|------------------|---------------|------------------|---------------|------------------|-----------------------|--------------------|------------|
| 20-025 | Baseline | 89.8                     | 34.0                       | 3.75         | 36.1                     | 2395.6      | 26.4                      | 9.90          | 116.7           | 1.065            | 69.7          | 4.10             | 137           | 5.41             | n.d.                  | 6.54               | trace      |
|        | 48 hour  | 103.4                    | 33.8                       | 3.75         | 34.6                     | 2429.6      | 24.4                      | 10.32         | 119.1           | 1.14             | 90.3          | 4.75             | 152           | 5.59             | 0.024                 | 6.64               | trace      |

Hemolysis observed; may falsely elevate AST.

n.d. - not detected

**Table S3.** Baseline and 48 hour post-MPV complete blood count and biochemistry panel for 20-031.

|                                  |        |
|----------------------------------|--------|
| Presence of clots                | none   |
|                                  | none   |
| MPV (fL)                         | 12.8   |
|                                  | 12.7   |
| Platelets (K/uL)                 | 159    |
|                                  | 148    |
| RDW %                            | 20.7   |
|                                  | 19.7   |
| MCHC (g/dL)                      | 31.8   |
|                                  | 30.4   |
| MCH (pg)                         | 13.9   |
|                                  | 12.8   |
| MCV (fL)                         | 43.8   |
|                                  | 42.0   |
| Hematocrit %                     | 54.1   |
|                                  | 43.4   |
| Hemoglobin (g/dL)                | 17.2   |
|                                  | 13.2   |
| RBC (M/uL)                       | 12.35  |
|                                  | 10.34  |
| Basophil %                       | 0.38   |
|                                  | 0.13   |
| Eosinophil %                     | 15.33  |
|                                  | 3.18   |
| Monocyte %                       | 7.29   |
|                                  | 1.82   |
| Lymphocyte %                     | 41.70  |
|                                  | 23.38  |
| Neutrophil %                     | 35.30  |
|                                  | 71.49  |
| Absolute Basophil cells (K/uL)   | 0.05   |
|                                  | 0.02   |
| Absolute Eosinophil cells (K/uL) | 2.19   |
|                                  | 0.39   |
| Absolute Monocyte cells (K/uL)   | 1.04   |
|                                  | 0.22   |
| Absolute Lymphocyte cells (K/uL) | 5.95   |
|                                  | 2.89   |
| Absolute Neutrophil cells (K/uL) | 5.03   |
|                                  | 8.84   |
| WBC (K/uL)                       | 14.26  |
|                                  | 12.36  |
| ID #                             | 20-031 |

|                            |        |
|----------------------------|--------|
| Hemolysis:                 | none   |
|                            | none   |
| Total Protein g/dL         | 6.49   |
|                            | 6.07   |
| Total Bilirubin mg/dL      | 0.022  |
|                            | n.d.   |
| Phosphorus mg/dL           | 6.74   |
|                            | 5.63   |
| Sodium mmol/L              | 155    |
|                            | 150    |
| Potassium mmol/L           | 5.97   |
|                            | 4.61   |
| Glucose mg/dL              | 70.6   |
|                            | 92.9   |
| Creatinine mg/dL           | 0.788  |
|                            | 0.731  |
| Chloride mmol/L            | 118.7  |
|                            | 116.5  |
| Calcium mg/dL              | 10.87  |
|                            | 10.26  |
| Blood Urea Nitrogen mg/dL  | 23.2   |
|                            | 22.5   |
| Amylase U/L                | 1394.5 |
|                            | 1291.3 |
| Alkaline Phosphatase U/L   | 25.9   |
|                            | 26.9   |
| Albumin g/dL               | 4.24   |
|                            | 3.99   |
| Aspartate Transaminase U/L | 31.4   |
|                            | 41.4   |
| Alanine Transaminase U/L   | 89.6   |
|                            | 94.1   |
| ID #                       | 20-031 |

Hemolysis observed; may falsely elevate AST.  
n.d. - not detected
